# Supplementary material
Source: PubMed Central journal article supplement (PMC6885618)
Supplement: supp_RA119.010494_154803_0_supp_373722_pvrm85.pdf [file supp_RA119.010494_154803_0_supp_373722_pvrm85.pdf]

## Supplementary Figures

Fig S1. Statistics of NMR distance restraints obtained for Tk-hefu

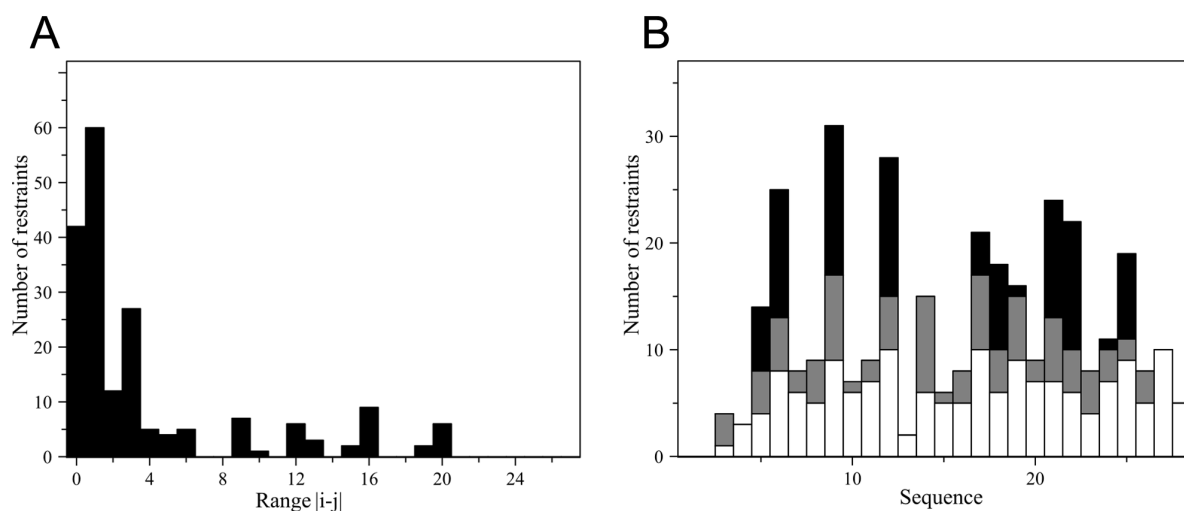

Left panel, the distribution of distance restraints for the given distance between the residues in the amino acid sequence of Tk-hefu ( $|i-j|$ ). Right panel, residue-based distance restraint statistics. The number of short-range ( $|i-j| < 2$ , white), medium-range ( $1 < |i-j| < 5$ , gray) and long-range ( $|i-j| > 4$ , black) restraints is plotted against the residue number. This figure is a standard output of the CYANA software.

**Fig S2. Activity of Tk-hefu mutants on K<sub>v</sub>1.1, K<sub>v</sub>1.2 and K<sub>v</sub>1.6 channels**

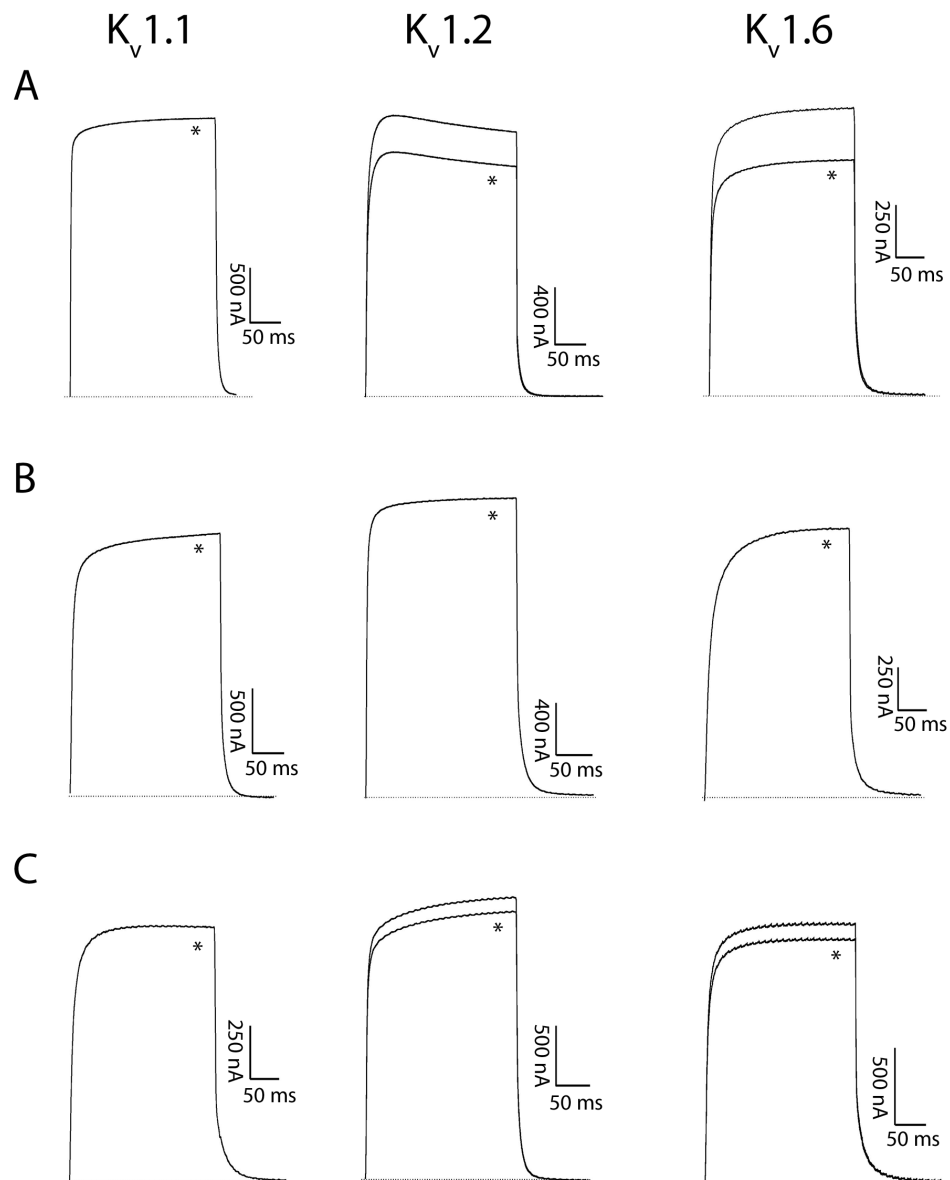

Traces shown are representatives of at least three independent experiments ( $n \geq 3$ ). The dotted line indicates the zero current level. Asterisks (\*) distinguish the steady-state current after application of 40 μM Tk-hefu-2 (A), Tk-hefu-3 (B), or Tk-hefu-4 (C).

**Fig S3. Time course of K<sub>v</sub>1.3 current inhibition with Tk-hefu-2 and the recovery of inhibition upon washout**

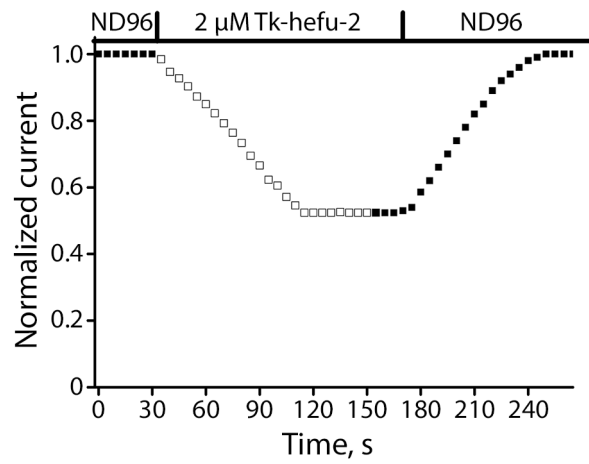

Shown is a representative experiment with 2 μM Tk-hefu-2. Closed squares, ND96 conditions; open squares, application of Tk-hefu-2. The time course of a representative experiment is shown to indicate the rate of washin and washout. The binding of Tk-hefu-2 was reversible.
